# Supplementary material for: Bigger and Better? Representativeness of the Influenza A Surveillance Using One Consolidated Clinical Microbiology Laboratory Data Set as Compared to the Belgian Sentinel Network of Laboratories
Source: PubMed Central journal article supplement (PMC6591264; doi:10.3389/fpubh.2019.00150), 2019-06-18
Supplement: Data_Sheet_1.pdf [file Data_Sheet_1.pdf]

**Supplemental digital content 1:** Epiflu Isolate IDs and DNA Accession Numbers for the Influenza A (H1N1) Hemagglutinin sequences used in the phylogenetic analyses in this study. Additional to the 39 samples from LHUB-ULB, the following sequences were used: The vaccine strain for the 2015/2016 season (A/California/7/2009 (H1N1)pdm09); all 17 Influenza A (H1N1) sequences identified with Belgium as place of isolation for the same time period and a random selection of an equal number of 55 Influenza A (H1N1) sequences with the UK as place of isolation for the same time period.

| <b>Isolate_Id</b> | <b>DNA Accession no.</b> |                   |
|-------------------|--------------------------|-------------------|
| EPI_ISL_29577     | EPI176504                | Vaccine 2015/2016 |
| EPI_ISL_217490    | EPI737453                | Belgium samples   |
| EPI_ISL_217489    | EPI737448                |                   |
| EPI_ISL_217487    | EPI737446                |                   |
| EPI_ISL_217486    | EPI737442                |                   |
| EPI_ISL_215825    | EPI731164                |                   |
| EPI_ISL_215824    | EPI731163                |                   |
| EPI_ISL_215823    | EPI731162                |                   |
| EPI_ISL_215822    | EPI731161                |                   |
| EPI_ISL_215821    | EPI731160                |                   |
| EPI_ISL_215820    | EPI731159                |                   |
| EPI_ISL_215819    | EPI731158                |                   |
| EPI_ISL_215818    | EPI731157                |                   |
| EPI_ISL_215817    | EPI731156                |                   |
| EPI_ISL_213844    | EPI718571                |                   |
| EPI_ISL_213829    | EPI718483                |                   |
| EPI_ISL_213827    | EPI718460                |                   |
| EPI_ISL_213818    | EPI718401                |                   |
| EPI_ISL_212266    | EPI712137                |                   |
| EPI_ISL_212268    | EPI712150                |                   |
| EPI_ISL_214435    | EPI722265                |                   |
| EPI_ISL_214436    | EPI722273                |                   |
| EPI_ISL_214437    | EPI722281                |                   |
| EPI_ISL_214438    | EPI722289                |                   |
| EPI_ISL_214439    | EPI722297                |                   |
| EPI_ISL_214440    | EPI722305                |                   |
| EPI_ISL_214441    | EPI722313                |                   |
| EPI_ISL_214442    | EPI722321                |                   |
| EPI_ISL_214443    | EPI722325                |                   |
| EPI_ISL_214444    | EPI722333                |                   |
| EPI_ISL_214445    | EPI722337                |                   |
| EPI_ISL_214446    | EPI722341                |                   |
| EPI_ISL_214447    | EPI722349                |                   |
| EPI_ISL_214448    | EPI722357                |                   |
| EPI_ISL_241127    | EPI876576                |                   |
| EPI_ISL_241128    | EPI876584                |                   |
| EPI_ISL_241129    | EPI876592                |                   |
| EPI_ISL_241130    | EPI876600                |                   |
| EPI_ISL_241131    | EPI876608                |                   |
| EPI_ISL_241132    | EPI876616                |                   |
| EPI_ISL_241133    | EPI876624                |                   |
| EPI_ISL_241134    | EPI876632                |                   |
| EPI_ISL_241136    | EPI876648                |                   |
| EPI_ISL_241137    | EPI876656                |                   |

|                |           |
|----------------|-----------|
| EPI_ISL_241138 | EPI876664 |
| EPI_ISL_241139 | EPI876672 |
| EPI_ISL_241140 | EPI876680 |
| EPI_ISL_241141 | EPI876688 |
| EPI_ISL_241142 | EPI876696 |
| EPI_ISL_241143 | EPI876704 |
| EPI_ISL_241144 | EPI876712 |
| EPI_ISL_241146 | EPI876726 |
| EPI_ISL_241147 | EPI876734 |
| EPI_ISL_241148 | EPI876742 |
| EPI_ISL_241149 | EPI876750 |
| EPI_ISL_241150 | EPI876758 |
| EPI_ISL_241151 | EPI876766 |
| EPI_ISL_241152 | EPI876774 |
| EPI_ISL_241153 | EPI876782 |
| EPI_ISL_241154 | EPI876790 |
| EPI_ISL_241155 | EPI876798 |
| EPI_ISL_241156 | EPI876806 |
| EPI_ISL_241157 | EPI876814 |
| EPI_ISL_241158 | EPI876822 |
| EPI_ISL_241159 | EPI876830 |
| EPI_ISL_241160 | EPI876838 |
| EPI_ISL_241162 | EPI876854 |
| EPI_ISL_241163 | EPI876862 |
| EPI_ISL_241164 | EPI876870 |
| EPI_ISL_241165 | EPI876878 |
| EPI_ISL_241166 | EPI876886 |
| EPI_ISL_241167 | EPI876894 |
| EPI_ISL_241168 | EPI876902 |
