# Supplementary material for: Bigger and Better? Representativeness of the Influenza A Surveillance Using One Consolidated Clinical Microbiology Laboratory Data Set as Compared to the Belgian Sentinel Network of Laboratories
Source: PubMed Central journal article supplement (PMC6591264; doi:10.3389/fpubh.2019.00150), 2019-06-18

Supplemental Digital Content 2: Geographical representativeness of the LHUB-ULB data's in the flu infection's notification in the BSNL in 2016

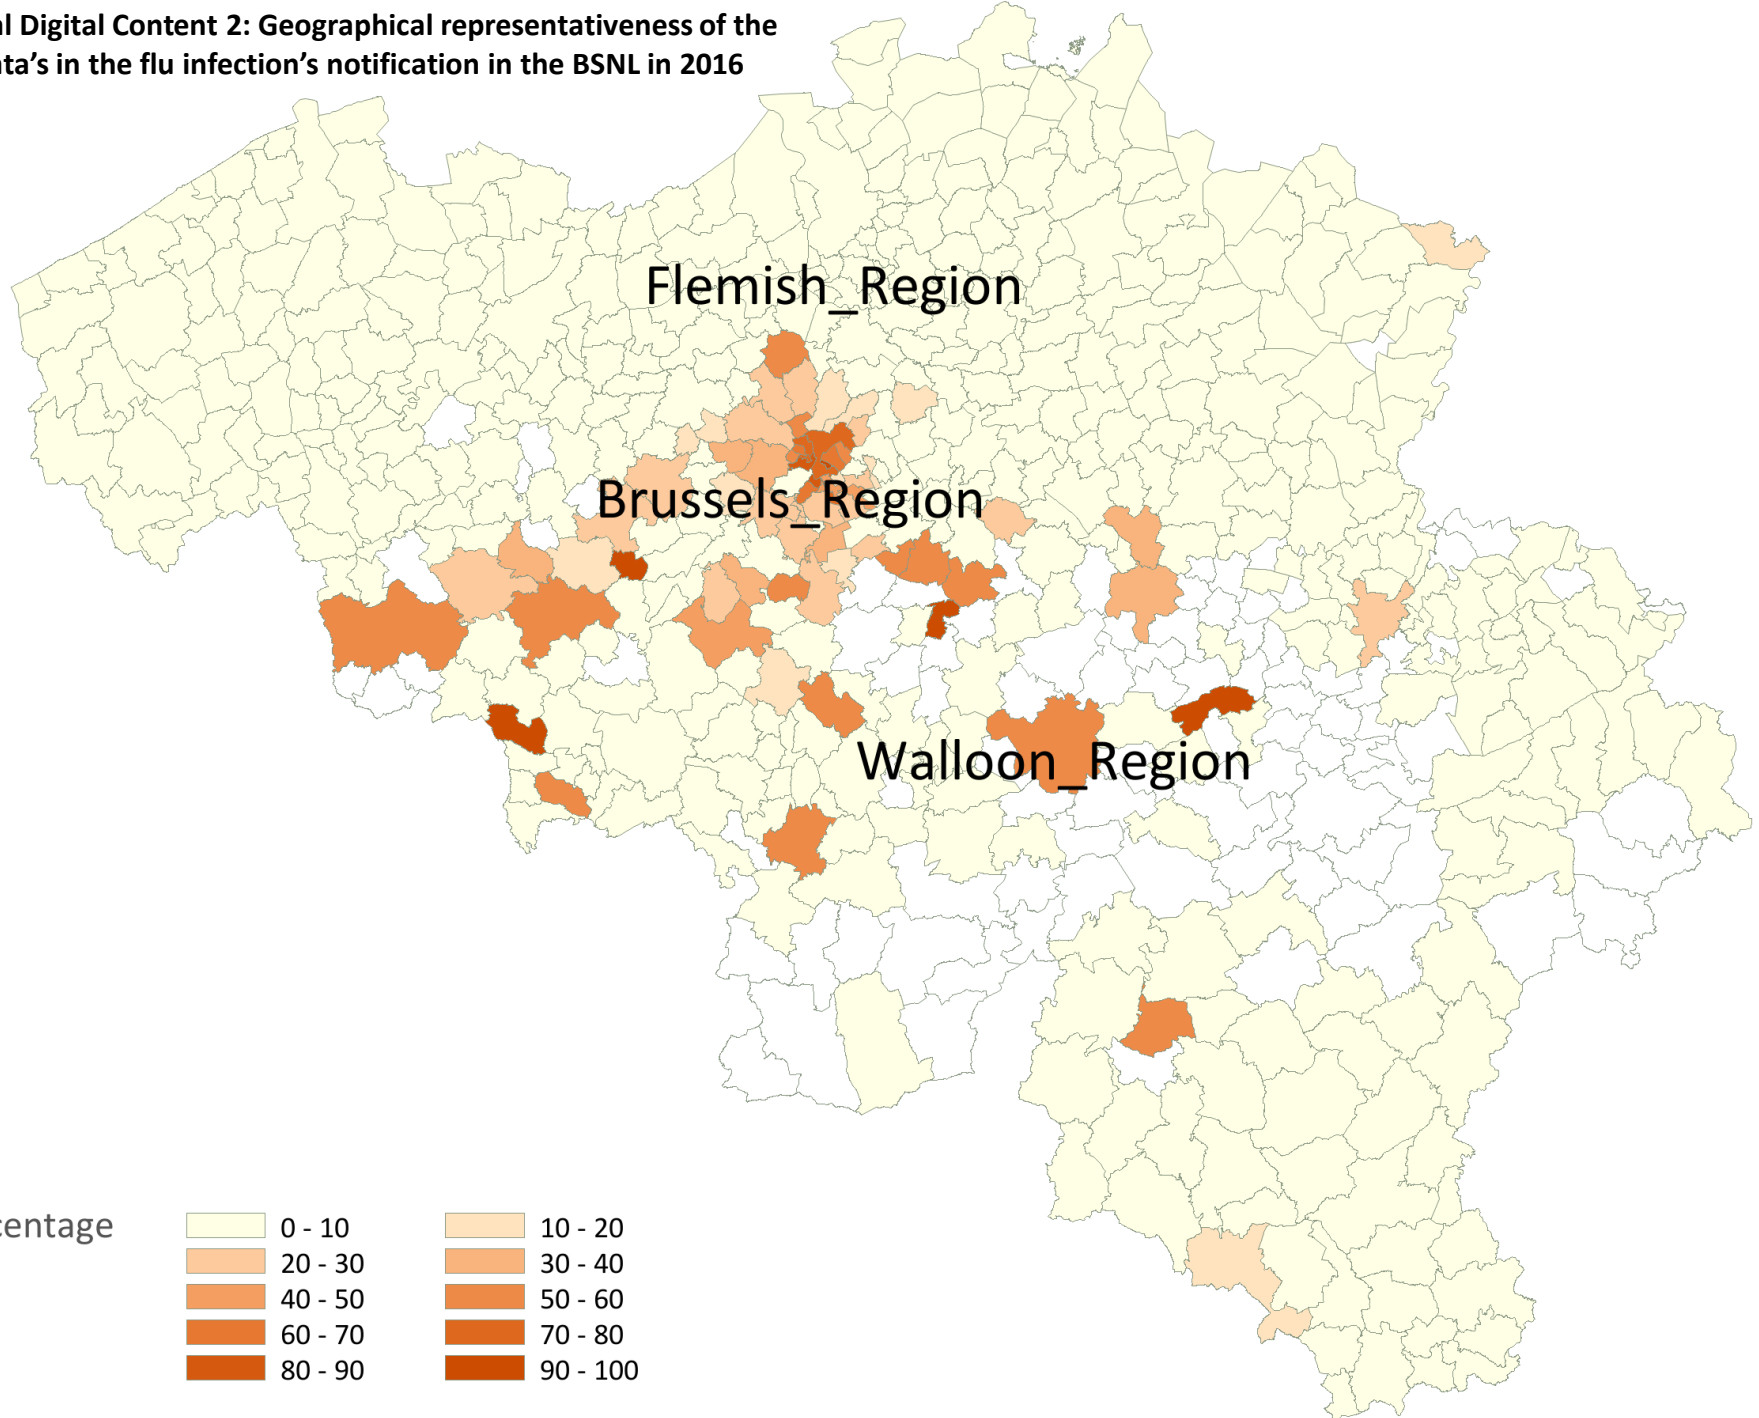

Supplement: Data_Sheet_2.pdf [file Data_Sheet_2.pdf]
