# Supplementary material for: Bigger and Better? Representativeness of the Influenza A Surveillance Using One Consolidated Clinical Microbiology Laboratory Data Set as Compared to the Belgian Sentinel Network of Laboratories
Source: PubMed Central journal article supplement (PMC6591264; doi:10.3389/fpubh.2019.00150), 2019-06-18
Supplement: Data_Sheet_3.pdf [file Data_Sheet_3.pdf]

### Supplemental digital content 3:

**Tableau 1 :** Spearman's rank correlation between all the flu's cases notified by the LHUB-ULB and all the flu's cases notified by the BSNL, BSNL- and ILI consultation rates (national and per region) compared weekly during 2014-2017

|                                      | LHUB-ULB vs BSNL | LHUB-ULB vs BSNL- | LHUB-ULB vs ILI |
|--------------------------------------|------------------|-------------------|-----------------|
| <b>Belgium<br/>2014-2017</b>         | 0.9114           | 0.8916            | 0.7816          |
| <b>Brussels Region<br/>2014-2017</b> | 0.9668           | 0.9405            | 0.7180          |
| <b>Flanders Region<br/>2014-2017</b> | 0.7776           | 0.7712            | 0.7255          |
| <b>Walloon Region<br/>2014-2017</b>  | 0.7139           | 0.7036            | 0.6301          |

*Pvalue: < 0.0001 for all comparison  $\rho_{sp}$  test*

**Tableau 2 :** Spearman's rank correlation between all the flu's cases notified by the LHUB-ULB and all the flu's cases notified by the BSNL, BSNL- and ILI consultation rates (national and per region) compared weekly during the three influenza seasons.

|                              | LHUB-ULB vs BSNL | LHUB-ULB vs BSNL- | LHUB-ULB vs ILI |
|------------------------------|------------------|-------------------|-----------------|
| <b>Belgium</b>               |                  |                   |                 |
| 2014-2015 (w40/14 to w39/15) | 0.9041           | 0.8889            | 0.7580          |
| 2015-2016 (w40/15 to w39/16) | 0.9151           | 0.8986            | 0.7956          |
| 2016-2017 (w40/16 to w39/17) | 0.8613           | 0.8311            | 0.7779          |
| <b>Brussels Region</b>       |                  |                   |                 |
| 2014-2015 (w40/14 to w39/15) | 0.9697           | 0.9476            | 0.7224          |
| 2015-2016(w40/15 to w39/16)  | 0.9776           | 0.9545            | 0.6921          |
| 2016-2017(w40/16 to w39/17)  | 0.9293           | 0.8902            | 0.7637          |
| <b>Flanders Region</b>       |                  |                   |                 |
| 2014-2015(w40/14 to w39/15)  | 0.8217           | 0.8171            | 0.7735          |
| 2015-2016(w40/15 to w39/16)  | 0.8874           | 0.8871            | 0.8294          |
| 2016-2017(w40/16 to w39/17)  | 0.6067           | 0.5877            | 0.5765          |
| <b>Wallonia</b>              |                  |                   |                 |
| 2014-2015 (w40/14 to w39/15) | 0.7263           | 0.7127            | 0.4972          |
| 2015-2016 (w40/15 to w39/16) | 0.8428           | 0.8400            | 0.8347          |
| 2016-2017 (w40/16 to w39/17) | 0.5785           | 0.5526            | 0.5801          |

*Pvalue: < 0.0001 for all comparison  $\rho_{sp}$  test*
