# Supplementary material for: Bigger and Better? Representativeness of the Influenza A Surveillance Using One Consolidated Clinical Microbiology Laboratory Data Set as Compared to the Belgian Sentinel Network of Laboratories
Source: PubMed Central journal article supplement (PMC6591264; doi:10.3389/fpubh.2019.00150), 2019-06-18
Supplement: Data_Sheet_4.pdf [file Data_Sheet_4.pdf]

**Supplemental digital content 4:** Numbers and proportion of the different types and subtypes of Influenza analysed during three consecutive seasons (2014-2017) by the NIC in comparison with the LHUB-ULB

|                  |                                                                          |                            | NRC  |       |      |      |      |       |       |      | LHUB-ULB |      |       |      |      |      |       |     |     |      |
|------------------|--------------------------------------------------------------------------|----------------------------|------|-------|------|------|------|-------|-------|------|----------|------|-------|------|------|------|-------|-----|-----|------|
|                  |                                                                          |                            | FLU  | FLU A |      |      |      | FLU B |       |      |          | FLU  | FLU A |      |      |      | FLU B |     |     |      |
|                  |                                                                          |                            |      | total | A H1 | A H3 | A NT | total | YAM   | VIC  | B NL     |      | total | A H1 | A H3 | A NT | total | YAM | VIC | B NL |
| Season 2014-2015 | from week 40/2014 (Sept 29th, 2014) to week 20/2015 (May 15th, 2015)     | Number of positive samples | 485  | 405   | 60   | 325  | 19   | 79    | 73    | 6    | 0        | 655  | 529   | -    | -    | -    | 127   | -   | -   | -    |
|                  |                                                                          | Number of tested samples   | 932  | 485   | 405  | 405  | 405  | 485   | 79    | 79   | 0        | 5321 | 655   | -    | -    | -    | 655   | -   | -   | -    |
|                  |                                                                          | Percentage (%)             | 52,0 | 83,5  | 14,8 | 80,2 | 4,7  | 16,3  | 92,4  | 7,6  |          | 12,3 | 80,8  | -    | -    | -    | 19,4  | -   | -   | -    |
| Season 2015-2016 | from week 40/2015 (Sept 28, 2015) to week 19/2016 (May 15, 2016)         | Number of positive samples | 381  | 186   | 173  | 2    | 11   | 197   | 6     | 190  | 1        | 880  | 427   | -    | -    | -    | 465   | -   | -   | -    |
|                  |                                                                          | Number of tested samples   | 743  | 381   | 186  | 186  | 186  | 381   | 197   | 197  | 197      | 5580 | 880   | -    | -    | -    | 880   | -   | -   | -    |
|                  |                                                                          | Percentage (%)             | 51,3 | 48,8  | 93,0 | 1,1  | 5,9  | 51,7  | 3,0   | 96,4 | 0,5      | 15,8 | 48,5  | -    | -    | -    | 52,8  | -   | -   | -    |
| Season 2016-2017 | from week 40/2016 (October 3rd, 2016) to week 12/2017 (March 26th, 2017) | Number of positive samples | 331  | 331   | 3    | 322  | 6    | 1     | 1     | 0    | 0        | 606  | 597   | -    | -    | -    | 9     | -   | -   | -    |
|                  |                                                                          | Number of tested samples   | 634  | 331   | 331  | 331  | 331  | 331   | 1     | 1    | 1        | 5840 | 606   | -    | -    | -    | 606   | -   | -   | -    |
|                  |                                                                          | Percentage (%)             | 52,2 | 100,0 | 0,9  | 97,3 | 1,8  | 0,3   | 100,0 | 0,0  | 0,0      | 10,4 | 98,5  | -    | -    | -    | 1,5   | -   | -   | -    |

NT: not subtyped/ non subtypable - NL: no lineage determined
